# Supplementary material for: Advances and challenges in immunotherapy in head and neck cancer
Source: Frontiers journal article supplement (doi:10.3389/fimmu.2025.1596583), 2025-06-06
Supplement: Table_7.doc [file Table_7.doc]

May 9, 2025

Dr. Zheran Liu

Editor-In-Chief

*Frontiers in Immunology*

Dear Dr. Liu,

Please find attached a revised version of our review article titled “[Advances & Challenges in Immunotherapy in Head and Neck Cancer](https://review.frontiersin.org/Document/DownloadPDF?articleId=1596583&siteId=527&userId=3007852&roleId=16)” (Manuscript ID: 1596583), which we have revised based on the reviewers’ comments are submitting for further consideration for publication in *Frontiers in Immunology.*

Thank you for your remarks and suggestions to improve the manuscript. The authors would like

to appreciate your valuable time spent on reviewing the manuscript.

Our point-by-point response to the reviewers’ comments can be found below, with revisions to the manuscript highlighted in yellow in the manuscript file with track changes.

If you require any additional information regarding the revised manuscript, please do not hesitate to contact us.

Thank you for your consideration!

Sincerely,

Hazem Aboaid, MD

**Reviewer Comments:**

**Reviewer #1:** Head and neck squamous cell carcinoma (HNSCC) remains a challenging malignancy with suboptimal survival outcomes despite advances in surgery, radiotherapy, and chemotherapy. Immunotherapy, particularly immune checkpoint inhibitors (ICIs) targeting PD-1/PD-L1, has transformed treatment paradigms, yet its full potential in HNSCC is still being explored. This review evaluates the current landscape of immunotherapy in both locally advanced (LA) and recurrent/metastatic (R/M) HNSCC, discussing key clinical trials, emerging biomarkers, and
novel therapeutic strategies. For LA HNSCC, phase III trials such as KEYNOTE-412 and JAVELIN Head and Neck 100 failed to demonstrate survival benefits with ICI-chemoradiotherapy combinations in unselected populations, though post hoc analyses suggest efficacy in PD-L1-
positive tumors. Recent studies, including KEYNOTE-689 and NIVOPOSTOP GORTEC 2018-01, indicate potential benefits of perioperative ICIs in resectable disease. In R/M HNSCC, ICIs have redefined the standard of care. KEYNOTE-040 and CheckMate 141 led to FDA approvals of pembrolizumab and nivolumab, while KEYNOTE-048 established pembrolizumab monotherapy for PD-L1 CPS ≥1 and pembrolizumab plus chemotherapy as first-line treatment. However, dual checkpoint blockade trials (KESTREL, CheckMate 651) have yielded mixed results, highlighting the complexity of immune resistance. Beyond ICIs, emerging strategies include oncolytic virotherapy, chimeric antigen receptor (CAR)-T cell therapy, and cancer vaccines, with promising preclinical and early-phase clinical results. Biomarkers such as PD-L1 expression, tumor mutational burden (TMB), and HPV status play a critical role in treatment selection, but further validation is
needed. Despite advancements, challenges persist, including heterogeneous response rates, immune-related toxicities, and optimal integration of immunotherapy in multimodal treatment regimens. Future research should focus on refining biomarker-driven treatment algorithms, developing rational immunotherapy combinations, and leveraging tumor microenvironment modifications to enhance therapeutic efficacy. In general: interesting subject that is carried out well. The research is interesting and helpful. And I have a few advices:
1Please provide more abbriviations, that make readers easier to follow.
2Please try to explain the limitation of the present study more widely.
3Please refer to more recent publications.

**Author’s Response:** We thank the Reviewer for the thoughtful review, remarks and suggestions to improve the manuscript and we have now incorporated these.

**Reviewer #2:** The article provides a comprehensive overview of the current landscape of immunotherapy for head and neck squamous cell carcinoma (HNSCC), covering clinical trials of immune checkpoint inhibitors (ICIs) in both locally advanced (LA) and recurrent/metastatic (R/M) HNSCC, emerging biomarkers, and novel therapeutic strategies. This gives readers a broad perspective on the field. However, there are some issues that need to be further addressed to improve the quality of the article. Here are my suggestions and questions.

**Author’s Response:** We thank the Reviewer for the thoughtful review, remarks and suggestions to improve the manuscript and we have now incorporated these. We have provided a point-by-point response and also made changes in the manuscript.

1. Although this is a review article, briefly describe the literature search methods and criteria to ensure the reliability and reproducibility of the research findings.

**Author’s Response:** Thank you for this insightful comment. We have now added a brief description of methods at the end of introduction section.

1. Discuss the potential limitations of the article, such as bias in literature selection and data incompleteness, and propose directions for future research.

**Author’s Response:** Thank you for this suggestion. We have now added some limitations of our article at the end of conclusions section.

1. Define all abbreviations in the main text when first used (e.g., PD-1/PD-L1, HPV).

**Author’s Response:** Thank you for this comment. We have now defined all the abbreviations when first used.

1. When discussing clinical trials and research outcomes, a more critical analysis of their methodology, sample size, follow-up duration, and other factors that may affect the results is needed. This will help readers understand the limitations and potential issues of these results in clinical practice.

**Author’s Response:** Thank you for this insightful comment. However, we would like to emphasize that this is a review article not a meta-analysis. We believe that we have discussed enough information about each trial, in addition to further information included in the existing tables and the new bar charts we are adding. Therefore, we believe that more detailed discussion about studies’ methods, sample size..etc is beyond the scope of this review article.

1. For key clinical trial results, such as survival rates and response rates, consider using charts (e.g., bar charts, line charts) to visually present the data instead of relying solely on textual descriptions.

**Author’s Response:** Thank you for this suggestion. We have now added two additional figures (figure 3 and 4) including a few bar charts representing some survival and response data for some of the key clinical trials in both LA and R/M HNSCC.

1. When discussing TME and immune contexture, a more in-depth exploration of the roles of specific cell types (e.g., regulatory T cells) in HNSCC and their interactions with tumor cells is needed.

**Author’s Response:** Thank you for the comment. We have now further discussed the roles of different cell types in HNSCC and their interactions with tumor cells, this further discussion was added to the section “2.2 Tumor Immune Contexture in HNSCC”

1. When discussing ICIs and other immunotherapeutic strategies, a more detailed discussion on how to optimize treatment plans based on individual patient characteristics (e.g., tumor stage, biomarker expression, previous treatment history) is needed, including combination therapy strategies and sequencing.

**Author’s Response:** Thank you for this thoughtful comment. We have now further discussed this under section “7.6 Unanswered Questions”.

1. Emphasize the importance of biomarkers in patient selection and discuss how to achieve more precise personalized treatment through multimodal biomarkers (e.g., genomics, transcriptomics, immunomics).

**Author’s Response:** Thank you for the comment. We have now added further discussion about this under section “7.2 Refining Biomarker-Driven Patient Selection”.

1. Emphasize the importance of interdisciplinary collaboration (e.g., between immunologists, oncologists, bioinformaticians) in advancing HNSCC immunotherapy research and propose possible collaboration models and research directions.
2. In addition to existing immunotherapeutic strategies, explore the potential applications and research directions of emerging technologies (e.g., gene editing, AI-assisted drug design) in HNSCC immunotherapy.

**Author’s Response:** Thank you for those insightful comments. We have now added a new section to cover these ideas “7.5 The Role of Interdisciplinary Collaboration and Emerging Technologies”.

**Additional Comments:**

1. We have made some changes to the abbreviations throughout the text to help reduce redundancy.
2. We added two additional figures, given the order of the new figures in the text, they will be numbered figure 3 and figure 4. Therefore, the existing figure 3 will be changes to figure 5. I provided a copy of all aforementioned figures with the correct numbers. No changes were made to figures 1 and 2 themselves or to their order in the main text.
3. We have added a few minor information to the discussion of KEYNOTE-689 and NIVOPOSTOP trials in section “***3.3.1 Immunotherapy in the Perioperative Setting***”.
4. We have used four more additional references, all of them were added to the references section, and all the affected reference numbers in the main text were edited accordingly.
5. We have corrected the primary endpoints for some of the trials in table 2, and we have defined all the abbreviations.
